# Supplementary material for: Combined Strategy Using High Hydrostatic Pressure, Temperature and Enzymatic Hydrolysis for Development of Fibre-Rich Ingredients from Oat and Wheat By-Products
Source: MDPI journal article supplement (doi:10.3390/foods13030378), 2024-01-24
Supplement: s1 [file s1]

**Supplementary Supplementary Table S1.** Nutritional composition of wheat bran (WB) and oat hull (OH) samples. Values were expressed as g 100 g<sup>-1</sup> of dry matter. Abbreviations: TDF: total dietary fibre, PA: phytic acid. Different letters indicate significant differences ( $p < 0.05$ ).

|                      | WB                         | OH                        |
|----------------------|----------------------------|---------------------------|
| <b>Protein</b>       | 15.16 ± 0.40 <sup>b</sup>  | 3.06 ± 0.07 <sup>a</sup>  |
| <b>Fat</b>           | 3.86 ± 0.20 <sup>b</sup>   | 0.61 ± 0.01 <sup>a</sup>  |
| <b>Carbohydrates</b> | 74.73 ± 0.12 <sup>a</sup>  | 92.04 ± 0.07 <sup>b</sup> |
| <b>TDF</b>           | 45.24 ± 13.93 <sup>a</sup> | 89.64 ± 0.10 <sup>b</sup> |
| <b>Starch</b>        | 11.56 ± 0.83 <sup>b</sup>  | 2.89 ± 0.48 <sup>a</sup>  |
| <b>Ash</b>           | 6.26 ± 0.08 <sup>b</sup>   | 4.30 ± 0.00 <sup>a</sup>  |
| <b>Moisture</b>      | 12.58 ± 0.61 <sup>b</sup>  | 8.03 ± 0.02 <sup>a</sup>  |
| <b>PA</b>            | 3.55 ± 0.02 <sup>b</sup>   | 0.07 ± 0.00 <sup>a</sup>  |
| <b>β-glucan</b>      | 0.07 ± 0.01 <sup>a</sup>   | 0.12 ± 0.03 <sup>b</sup>  |
